# Supplementary material for: Poly(methyl methacrylate)-modified cellulose fibers patterned with highly selective chromogenic reagent for rapid and trace determination of Co2+ in water
Source: Royal Society of Chemistry journal article supplement (doi:10.1039/c8ay01746h), 2018-01-01
Supplement: c8ay01746h1.pdf [file c8ay01746h1.pdf]

### SUPPLEMENTARY INFORMATION (SI)

#### SI-1: Spectroscopic characterization of MHDI and its Co complex

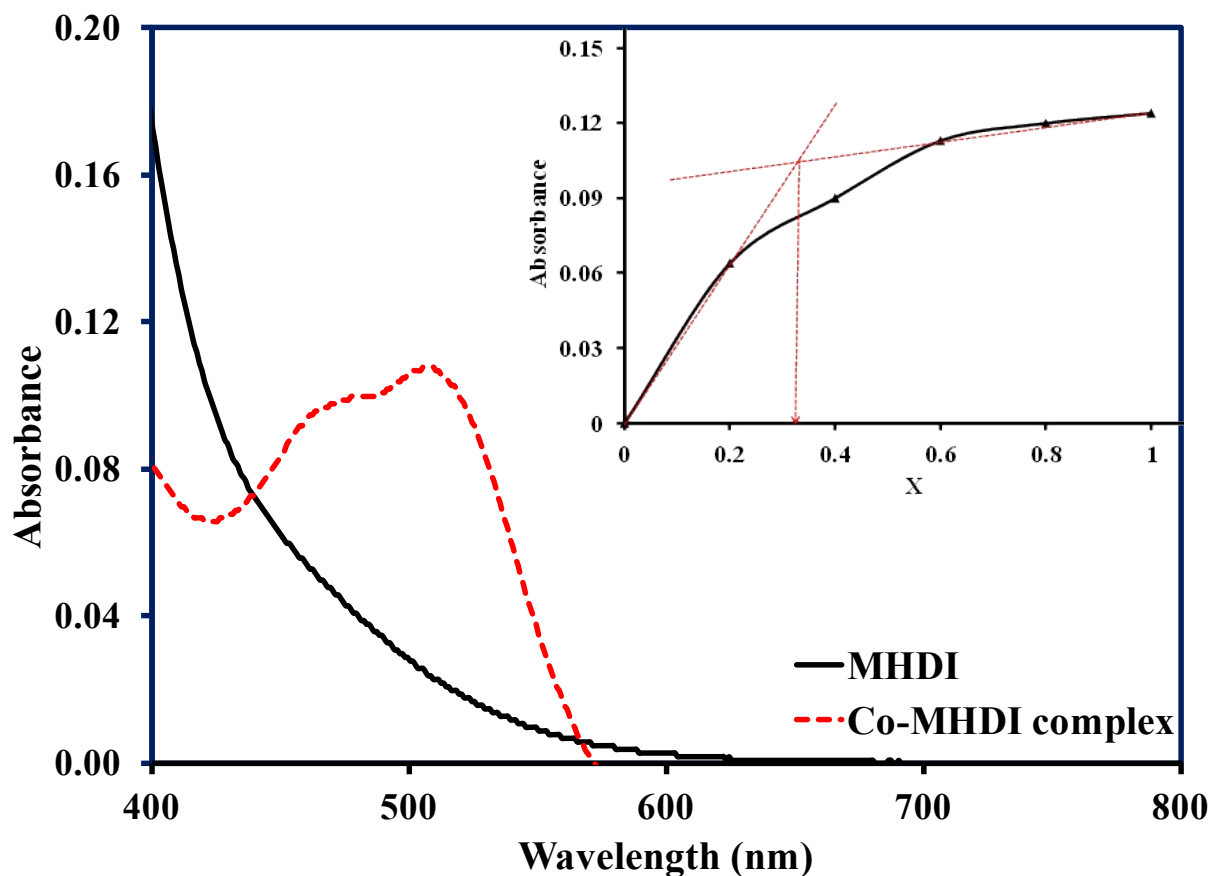

A) UV-Vis. spectra for the reagent MHDI and its complex with Co<sup>2+</sup>. Inset-B denotes Job's plot.

The reagent MHDI (SI-1a, b) presents in two tautomeric forms i.e., *keto* and *enol* where in the solution the latter (*enol* form) is more predominant in complex formation with Co<sup>2+</sup> producing the final end product (SI-1c). The UV-Vis spectra of the reagent MHDI showed two transitions at  $3.3 \times 10^4$  and  $2.3 \times 10^4$  cm<sup>-1</sup> and were safely assigned to  $\pi \rightarrow \pi^*$  and  $\pi \rightarrow \pi^*$  electronic transition at  $3.3 \times 10^4$  and  $2.3 \times 10^4$  cm<sup>-1</sup> (SI-2A) [1], respectively. On complex formation with Co<sup>2+</sup>, the electronic spectrum showed two energy transitions at  $2.13 \times 10^4$  and  $2.0 \times 10^4$  cm<sup>-1</sup> corresponding to internal ligand  $\pi \rightarrow \pi^*$  and charge transfer transition (O  $\rightarrow$  Co) and color

change were noticed indicating strong interaction between  $\text{Co}^{2+}$  centers (Co-Co) in octahedral planar geometry [2]. Three spin allowed  $d \rightarrow d$  transitions assigned to  ${}^4\text{T}_{1g} \rightarrow {}^4\text{A}_{2g}$   $\nu_1$  ( $d_{x^2-y^2} \rightarrow d_{z^2}$ ),  ${}^4\text{T}_{1g}(\text{F}) \rightarrow {}^4\text{T}_{1g}(\text{P})$   $\nu_2$  ( $d_{x^2-y^2} \rightarrow d_{xy}$ )  $d-d$  transitions are noticed in octahedral planar  $\text{Co}^{2+}$  complex (SI-2A) [2, 3]. Assuming formation of one complex species of  $\text{Co}^{2+}$  and based on the methods of continuous variations and molar ratio data (SI-2A, inset) [4], it can be concluded that, formation of 1:2  $\text{Co}^{2+}$  to MHDI molar ratio is achieved. Thus, the most probable structure of  $\text{Co}^{2+}$  complex is  $\text{CoL}_2(\text{H}_2\text{O})_2$  (where L= MHDI) as shown in SI-1c.

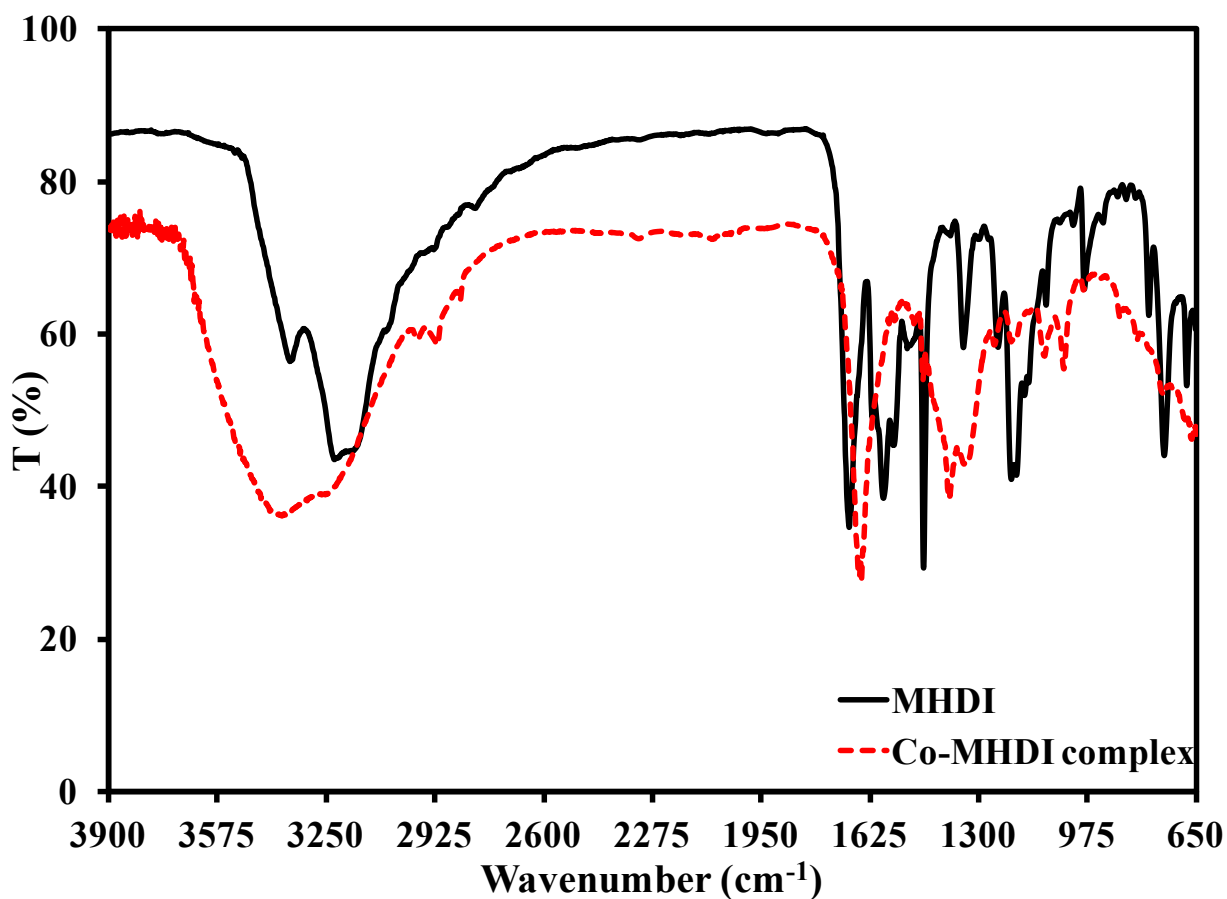

**B)** FTIR spectra for the reagent MHDI and its complex with  $\text{Co}^{2+}$ .

The most important FTIR vibrations of MHDI and its  $\text{Co}^{2+}$  complex are presented (SI-2B). The reagent spectrum showed vibrations at 3400 ( $\nu$  OH), 3250 ( $\nu$  NH), 1700 ( $\nu$  C=O) and 1580 ( $\nu$  C=N)  $\text{cm}^{-1}$  [5]. The characteristics infrared (FTIR) spectra of MHDI reagent was changed after

its reaction with  $\text{Co}^{2+}$ . The bands at 3025 and 3085  $\text{cm}^{-1}$  for  $\nu(\text{C-H})$  in the FTIR spectrum of the free reagent remained unchanged even after complex formation whereas the band at 3400  $\text{cm}^{-1}$  due to  $\nu(\text{O-H})$  was shifted to 3240  $\text{cm}^{-1}$  upon complex formation via hydroxyl group [5]. Complex formation was further confirmed by the participation of the  $\nu(-\text{C}=\text{N}-)$  N atom of the free MHDI with the  $\text{Co}^{2+}$ . The vibrations at 523 and 418  $\text{cm}^{-1}$  were assigned to  $\nu(\text{Cu-N})$  and  $(\text{Cu-O})$  in the FTIR spectrum of the complex.

SI-2: Comparison of  $\text{Co}^{2+}$  and  $\text{Zn}^{2+}$  assay on the developed platform

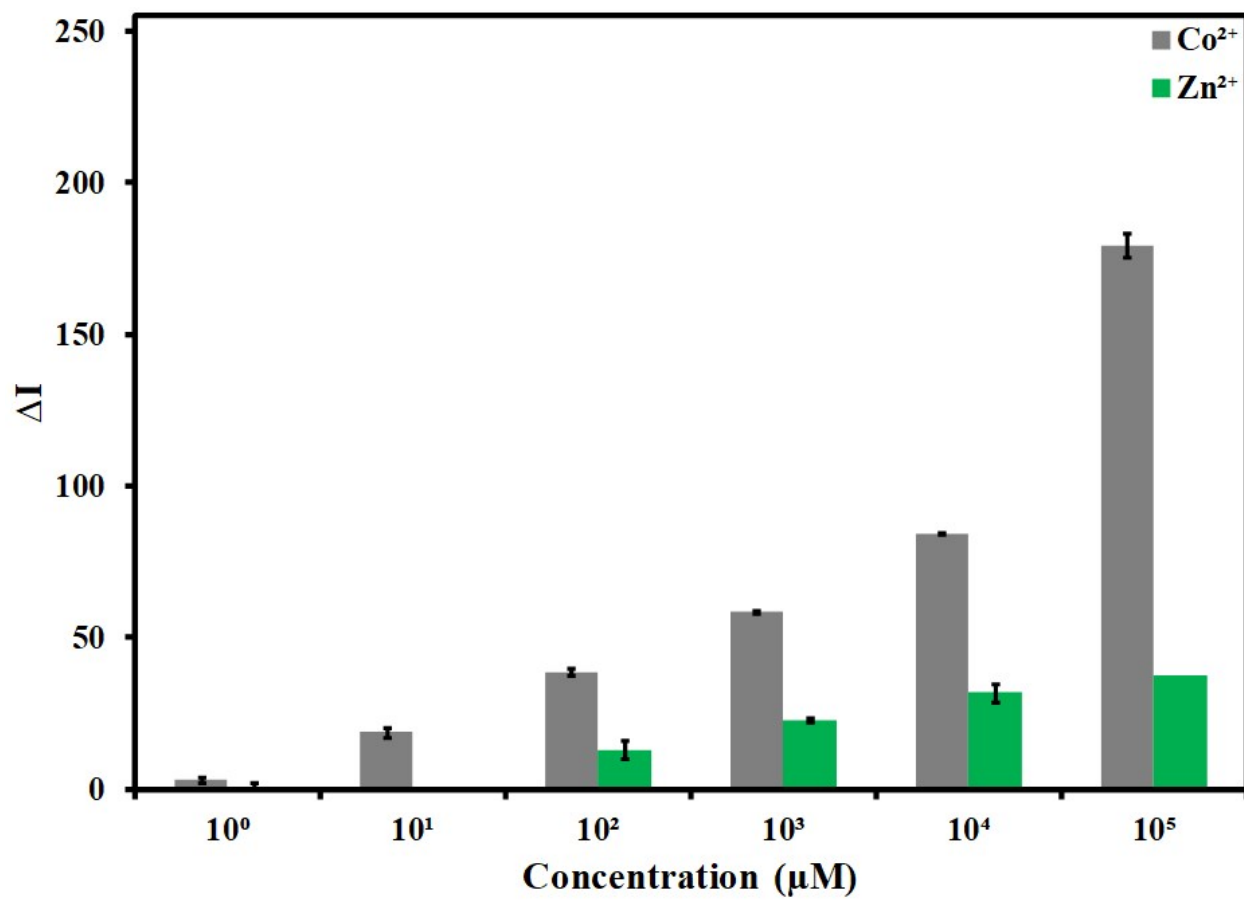

**SI-3: Composition of real water samples based on ICP-OES analysis.**

| <b>Analytes<br/>(mg/L)</b> | <b>Tap water<br/>(TW)</b> | <b>Industrial wastewater<br/>(IWW)</b> |
|----------------------------|---------------------------|----------------------------------------|
| Ag                         | BDL*                      | BDL                                    |
| Al                         | BDL                       | BDL                                    |
| B                          | 0.366                     | 0.08                                   |
| Ba                         | BDL                       | BDL                                    |
| Ca                         | 13.10                     | 34.25                                  |
| Cd                         | BDL                       | BDL                                    |
| Co                         | BDL                       | 0.102**                                |
| Cr                         | BDL                       | BDL                                    |
| Cu                         | BDL                       | 0.24                                   |
| Fe                         | BDL                       | BDL                                    |
| K                          | 0.82                      | 21.75                                  |
| Mg                         | 0.47                      | 14.05                                  |
| Mn                         | BDL                       | 0.004                                  |
| Ni                         | BDL                       | BDL                                    |
| Pb                         | BDL                       | BDL                                    |
| Zn                         | BDL                       | BDL                                    |

\*BDL: Below detection limit

\*\* 0.102 mg/mL=1.73  $\mu$ M

**References:**

[1] Ramachandran, R., Prakash, G., Selvamurugan, S., Viswanathamurthi, P., Malecki, J. G., Linert, W., Gusev, A., *RSC Advances* 2015, 5, 11405-11422.

[2] Lever, A. B. P., *Inorganic electronic spectroscopy*, Elsevier 1984.

[3] Basuli, F., Peng, S.-M., Bhattacharya, S., *Inorganic Chemistry* 2001, 40, 1126-1133.

[4] Sawyer, D. T., Heinemann, W. R., Beebe, J. M., *Chemistry Experiments for Instrumental Methods*, John Wiley & Sons 1984.

[5] Nakamoto, K., *Infrared and Raman Spectra of Inorganic and Coordination Compounds*, Wiley Interscience, New York 1971.
